# Supplementary material
Source: publisher figshare collection journal article supplement (https://acs.figshare.com/ndownloader/files/5086162)
Supplement: Supplementary file 1 [file 5086162]

# Combinatorial Biomimetics. Optimization of Composition of Copper(II) Poly-L-Histidine Complex as an Electrocatalyst for O<sub>2</sub> Reduction by Scanning Electrochemical Microscopy

Yu Ching Weng, Fu-Ren F. Fan, and Allen J. Bard\*

## Supporting Information

Solution phase electrochemical studies: Cyclic voltammograms (CVs) at a glassy carbon (GC) electrode in 0.5 M Na<sub>2</sub>SO<sub>4</sub> at pH 5.8 with or without 1 mM Cu<sup>2+</sup> and O<sub>2</sub> are shown in Fig. S1. The background current of the GC electrode in the absence of Cu<sup>2+</sup> and O<sub>2</sub> was relatively small (curve 1). In oxygen-saturated solution at a bare GC electrode, the O<sub>2</sub> reduction peak appeared at ~ -0.30 V vs. Ag/AgCl (curve 2). In deaerated 1 mM Cu<sup>2+</sup> solution, CV at a scan rate of 50 mV/s, showed the reduction of Cu<sup>2+</sup> to Cu<sup>0</sup> with a cathodic peak potential,  $E_{pc}$ , of -0.1 V vs. Ag/AgCl (curve 3). Cu<sup>0</sup> deposited on the electrode surface could be stripped off in the reverse scan with an anodic peak potential,  $E_{pa}$ , of 0.07 V. In oxygen-saturated solution, the reduction current increased and  $E_{pc}$  shifted slightly to a more positive value. The oxidation peak in the reverse scan was not observed until  $E_{pa} \sim 0.3$  V. Cu electrode has been reported to show a high catalytic activity for oxygen reduction in the neutral and alkaline media upon formation of surface Cu(OH)<sub>ads</sub> or Cu<sub>2</sub>O submonolayer.<sup>1,2</sup> It has been suggested that in the presence of oxygen, the interfacial pH increased due to oxygen reduction to OH<sup>-</sup> and a catalytic surface of Cu(OH)<sub>ads</sub> or Cu<sub>2</sub>O submonolayer formed, resulting in an increase in the rate of catalytic oxygen reduction.

In a deaerated 0.5 M Na<sub>2</sub>SO<sub>4</sub> solution containing 1 mM Cu<sup>2+</sup>, the cyclic voltammetric behavior at a GC electrode depended on the concentration of poly-L-histidine present in the solution (see Fig. S2). The magnitude of the current decreased with respect to that observed with only Cu<sup>2+</sup> present in the solution. In the potential range ( $-0.3 \leq E \leq 0.3$  V) studied, when the mole fraction of Cu<sup>2+</sup> was low, e.g., 0.33 for curve 1 of Fig. S2(a), the reduction current increased gradually to reach a plateau and a small stripping peak near the peak potential (~ 0.08 V vs. Ag/AgCl) for Cu<sup>0</sup> stripping was obtained in the reverse scan (see curve 1 of Fig. S2(a)). When the concentration of histidine residues was increased, the reduction current decreased and the re-oxidation peak disappeared in the reverse scan. Extending the potential window from 0.6 to -0.6 V vs. Ag/AgCl and using a Cu<sup>2+</sup> mole fraction of 0.09, we observed that the reduction plateau exhibited from -0.1 to -0.5 V vs. Ag/AgCl and a re-oxidation peak was obtained at 0.41 V vs. Ag/AgCl (see Fig. S2(b)). These results suggest that Cu<sup>2+</sup> ion complexes well with poly-L-histidine at a Cu<sup>2+</sup> mole fraction of 0.09 at pH 4.5. The current decrease was attributed to the

---

\* Corresponding author: [ajbard@mail.utexas.edu](mailto:ajbard@mail.utexas.edu)

lower diffusion coefficients of the  $\text{Cu}^{2+}$ -poly-L-histidine complexes formed and the increase of the complexation with increasing molar ratio of histidine residues to  $\text{Cu}^{2+}$ . CVs on a GC electrode in a solution containing 1 mM  $\text{Cu}^{2+}$  and 10 mM histidine residues in 0.5 M  $\text{Na}_2\text{SO}_4$  at pH 4.5 in the absence or presence of  $\text{O}_2$  are shown in Fig. S2(c). In a deaerated solution, the  $\text{Cu}^{2+}$ -poly-L-histidine complex started to reduce at 0.2 V vs. Ag/AgCl. In oxygen-saturated solution, the oxygen reduction commenced at -0.05 V vs. Ag/AgCl in the solution containing  $\text{Cu}^{2+}$ -poly-L-histidine complex, that is slightly more anodic than that in the absence of complex ( $\sim -0.13$  V vs. Ag/AgCl ) (compare curve 2 of Fig. S2(c) with curve 2 of Fig. 1). Thus,  $\text{Cu}^{2+}$ -poly-L-histidine complex in the solution also shows some electrocatalytic effect for oxygen reduction.

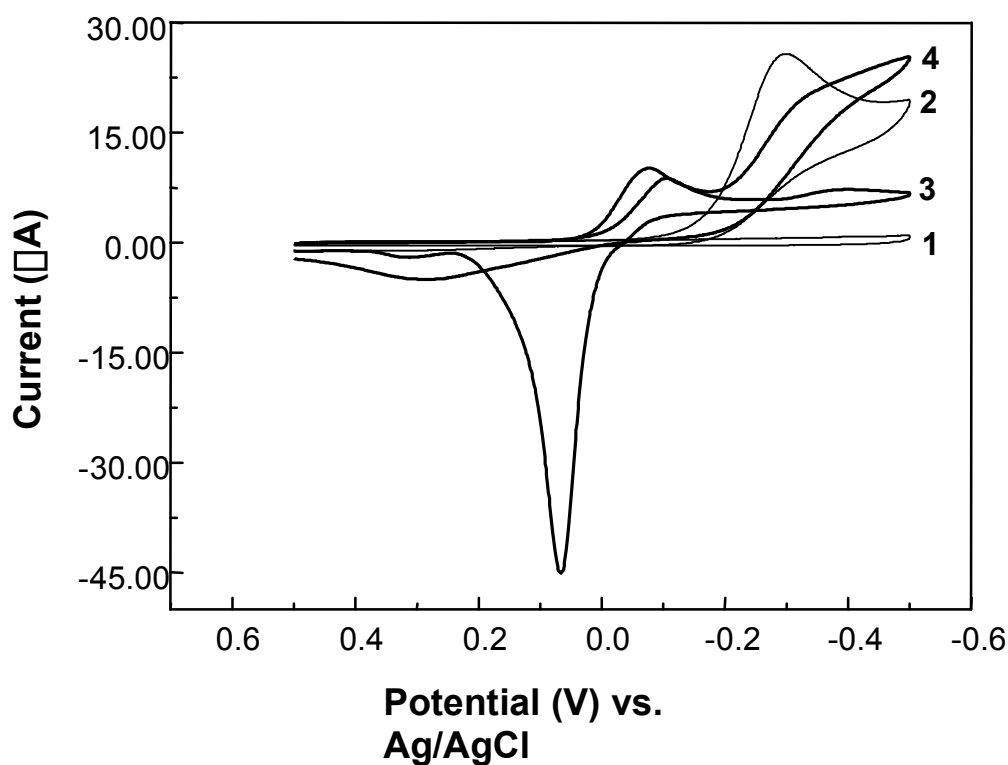

**Figure S1.** Cyclic voltammograms in the absence or presence of 1 mM  $\text{Cu}^{2+}$  in 0.5 M  $\text{Na}_2\text{SO}_4$  at GC electrode (3 mm in diameter) in the absence or presence of  $\text{O}_2$ . Potential scan rate,  $\nu = 50$  mV/s. *Curve 1:* no  $\text{Cu}^{2+}$ , no  $\text{O}_2$ ; *Curve 2:* no  $\text{Cu}^{2+}$ , with  $\text{O}_2$ ; *Curve 3:* 1 mM  $\text{Cu}^{2+}$ , no  $\text{O}_2$ ; *Curve 4:* 1 mM  $\text{Cu}^{2+}$ , with  $\text{O}_2$ .

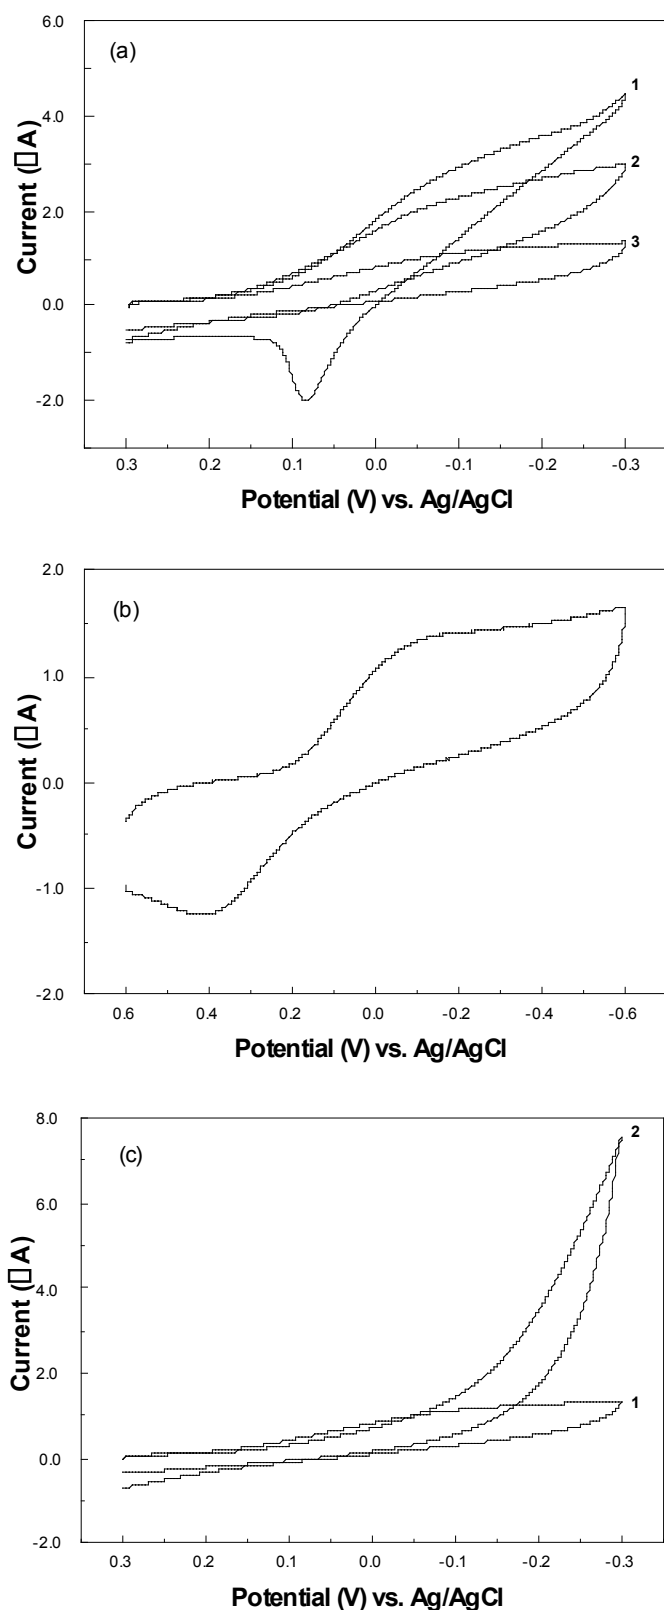

**Figure S2** (a). Cyclic voltammograms in the presence of various concentrations of poly-L-histidine with 1 mM Cu<sup>2+</sup> in 0.5 M Na<sub>2</sub>SO<sub>4</sub> at GC electrode (3 mm in diameter) in the absence of O<sub>2</sub> at pH 4.5. Potential scan rate,  $\nu$  = 50 mV/s. Curve 1: 2 mM histidine residues; Curve 2: 4 mM histidine residues; Curve 3: 10 mM histidine residues. (b) Expansion of potential window of curve 3 in (a). (c) Cyclic voltammograms in the absence and presence of O<sub>2</sub> in 0.5 M Na<sub>2</sub>SO<sub>4</sub> containing 1 mM Cu<sup>2+</sup> and 10 mM histidine residues.

The procedure for the preparation of the Cu-poly-his modified glassy carbon electrodes: The desired amount of poly-L-histidine (MW: 5000~15000) was added into 2 ml Milli-Q water. Sulfuric acid was continuously dropped into this solution until poly-L-histidine was totally soluble. The desired amount of  $\text{Cu}(\text{NO}_3)_2 \cdot 3\text{H}_2\text{O}$  was then added into the solution. After the solution was sufficiently mixed, the solution pH was adjusted to the desired value by NaOH. Ten  $\mu\text{L}$  of this mixed solution was pipetted onto the surface of GC electrodes. The  $\text{Cu}^{2+}$ -poly-L-histidine modified electrode was then dried in a container full of nitrogen. After the modified membrane was dried, the electrode was gently rinsed with Milli-Q water.

**Array preparation:** In the preparation of arrays of  $\text{Cu}^{2+}$ -poly-his complex spots of various compositions, two different solutions containing 10 mM poly-L-histidine and 10 mM  $\text{Cu}(\text{NO}_3)_2 \cdot 3\text{H}_2\text{O}$ , respectively, were first prepared. 5% v/v glycerol was added to each solution to avoid premature evaporation of the spots. The dispenser was filled with poly-L-histidine solution (3  $\mu\text{L}$ ), which was dispensed in a programmed number of drops at each site. Each composition was prepared repeatedly to test the reproducibility. Thus, the arrays contained 5 rows and 5 columns of spots. After dispensing the poly-L-histidine spots, the dispenser was emptied, thoroughly rinsed first with ethanol and then with Milli-Q water, and refilled with 3  $\mu\text{L}$  of  $\text{Cu}^{2+}$  solution. The plotter positioned the dispenser exactly over the previously prepared poly-L-histidine spots and a number of drops of  $\text{Cu}^{2+}$  solution dispensed to make the total amount of drops always equal to 12. The spots of the array were then agitated for 5 min in a Vortex Genie 2 agitator (Fisher). To remove the glycerol of the spots, the array was heated in the oven at  $100^\circ\text{C}$  over night.

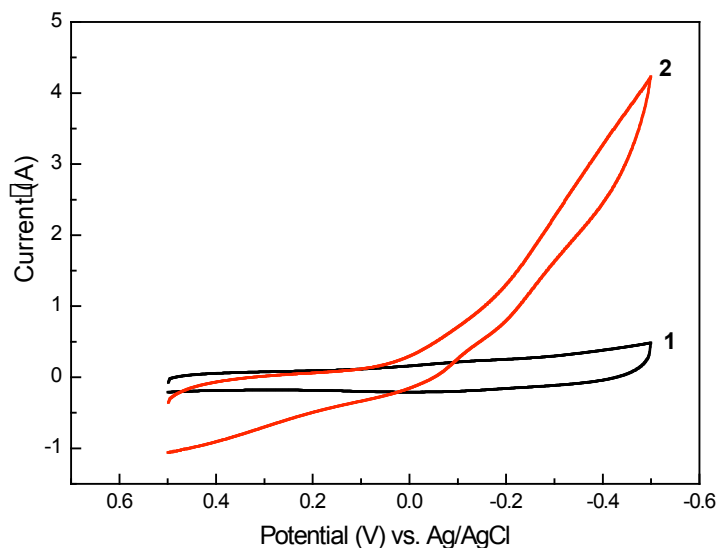

**Figure S3.** Cyclic voltammograms (CVs) of  $\text{Cu}^{2+}$ -poly-his modified GC electrode in 0.2 M PBS (pH 7) compared with bare GC electrode in the absence of  $\text{O}_2$ . The condition of modified films: 8 mM histidine residues, 2 mM  $\text{Cu}^{2+}$  at pH 5. Potential scan rate,  $v = 50 \text{ mV/s}$ . Curve 1: bare GC; Curve 2: modified GC.

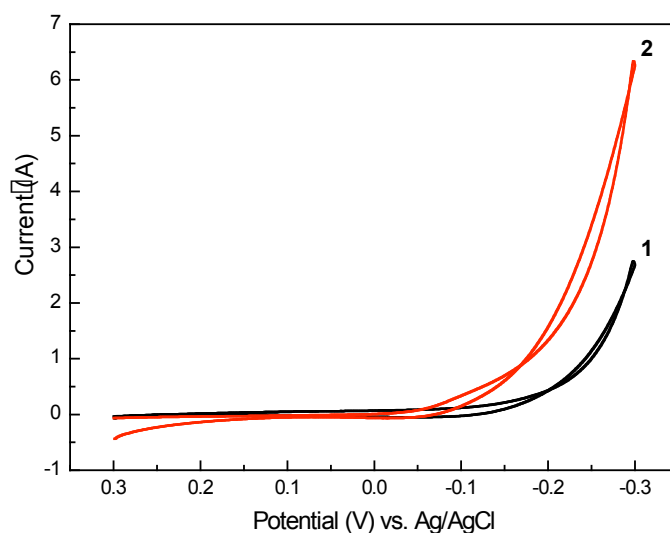

**Figure S4.** CVs of  $\text{Cu}^{2+}$ -poly-his modified GC electrode in 0.2 M PBS (pH 7) compared with bare GC electrode in the presence of  $\text{O}_2$  after subtracting the background current. The condition of modified films: 8 mM histidine residues, 2 mM  $\text{Cu}^{2+}$  at pH 5. Potential scan rate,  $\nu = 50$  mV/s. Curve 1: bare GC; Curve 2: modified GC.

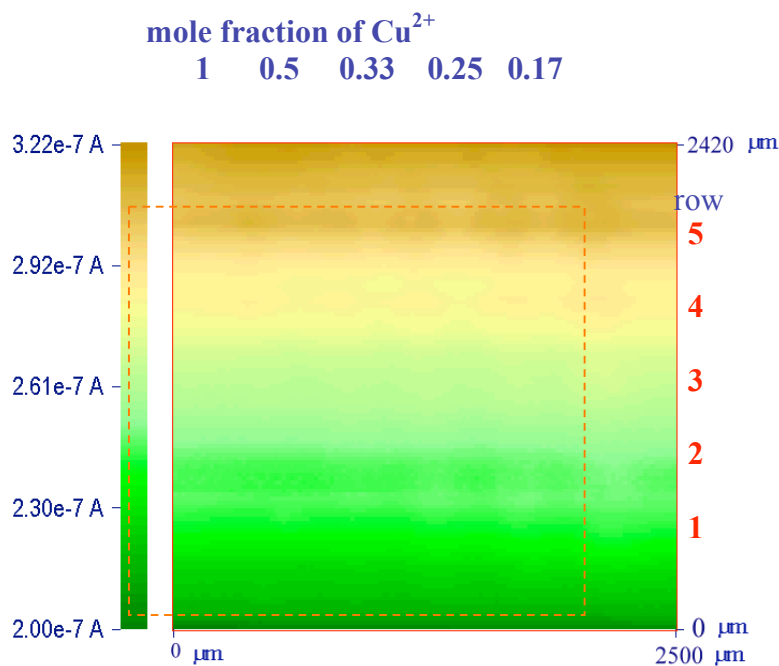

**Figure S5.** SECM image of the array containing 5 rows and 5 columns of spots with different mole fraction of  $\text{Cu}^{2+}$  at pH 7 phosphate buffer,  $i_T = 73$  nA ( $i_T$ : tip current),  $E_s = -0.3\text{V}$  vs. Ag/AgCl, tip raster rate: 20  $\mu\text{m}$  each 0.2 s.

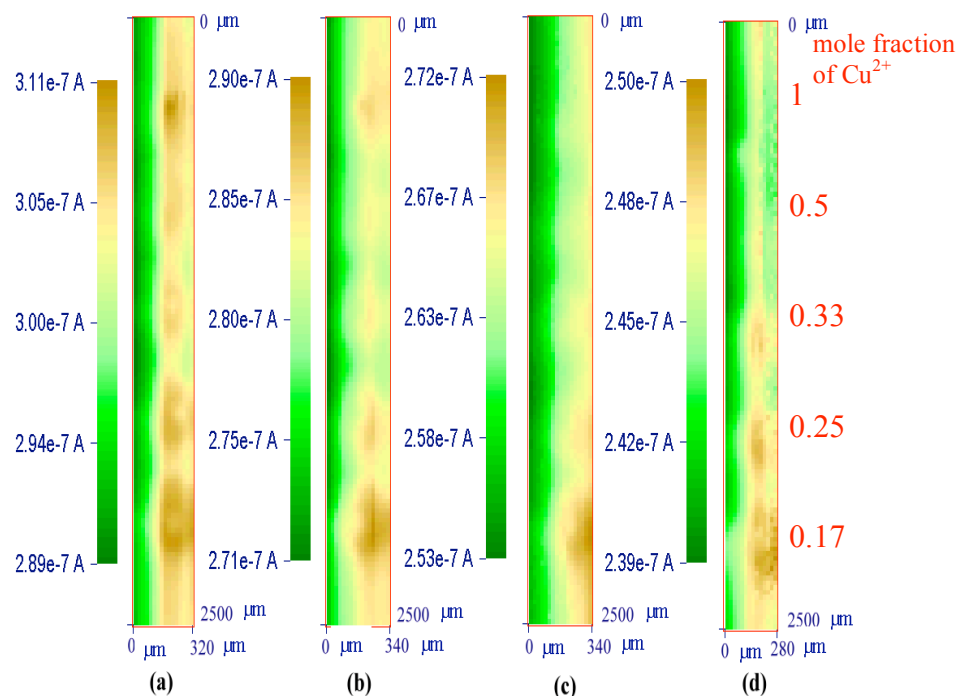

**Figure S6.** SECM images of Cu<sup>2+</sup>-poly-his arrays containing spots with different mole fraction of Cu<sup>2+</sup> at pH 7 phosphate buffer,  $i_T = 73$  nA ( $i_T$ : tip current),  $E_s = -0.3$  V vs. Ag/AgCl, tip raster rate: 20  $\mu\text{m}$  each 0.2 s (a) the fifth row (b) the fourth row (c) the third row (d) the second row.

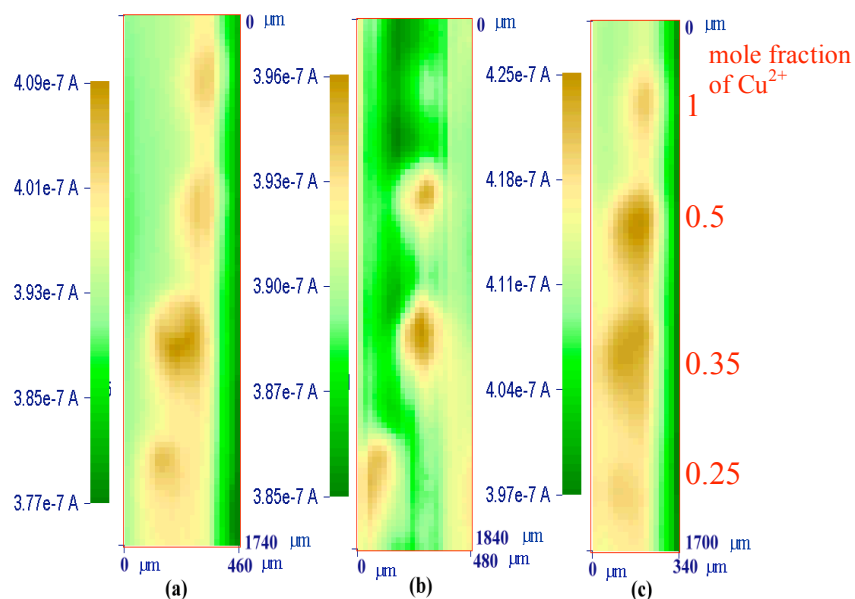

**Figure S7.** SECM images of Cu<sup>2+</sup>-poly-his arrays containing spots with different mole fraction of Cu<sup>2+</sup> at pH 7 phosphate buffer,  $i_T = 80.6$  nA ( $i_T$ : tip current),  $E_s = -0.2$  V vs. Ag/AgCl, tip raster rate: 20  $\mu\text{m}$  each 0.2 s (a) the third row (b) the second row (c) the first row for the first scan. Tip and substrate distance: 30  $\mu\text{m}$ .

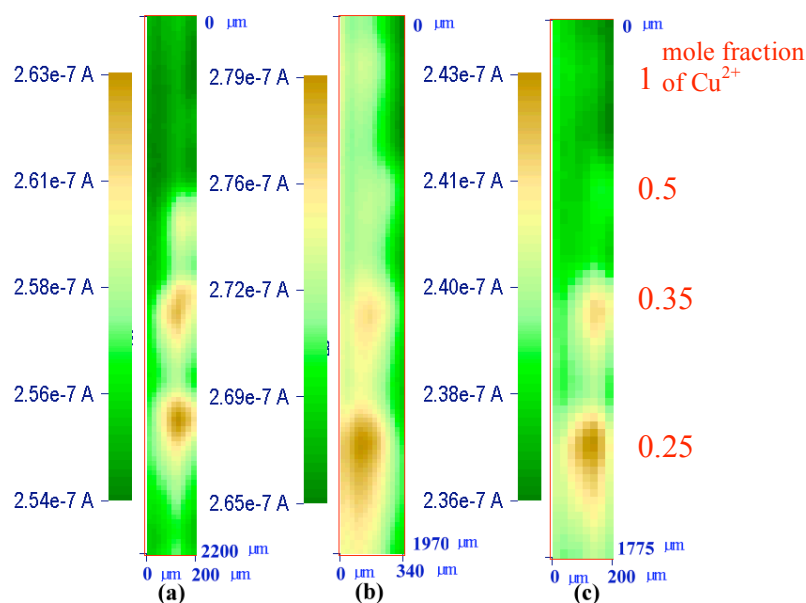

**Figure S8.** SECM images of  $\text{Cu}^{2+}$ -poly-his arrays containing spots with different mole fraction of  $\text{Cu}^{2+}$  at pH 7 phosphate buffer,  $i_T = 80.6 \text{ nA}$  ( $i_T$ : tip current),  $E_s = -0.2 \text{ V}$  vs. Ag/AgCl, (a) the second scan (b) the third scan (c) the fourth scan; scan rate:  $20 \text{ } \mu\text{m}$  each  $0.2 \text{ s}$  for (a), (b) and  $40 \text{ } \mu\text{m}$  each  $0.2 \text{ s}$  for (c). Tip and substrate distance:  $30 \text{ } \mu\text{m}$ .

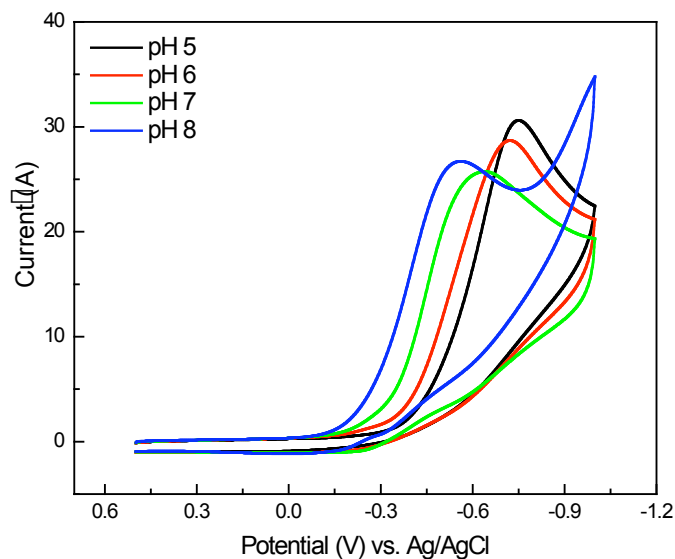

**Figure S9.** Cyclic voltammograms of GC electrode in  $0.2 \text{ M}$  PBS at various pH values in the present of  $\text{O}_2$ , Potential scan rate,  $\square = 50 \text{ mV/s}$ .

<sup>1</sup> Vazquez, M. V.; Sanchez, S. R.; Calco, E. J.; Schiffrin, D. J. *J. Electroanal. Chem.* **1994**, 374, 189-197.

<sup>2</sup> King, F.; Litke, C. D.; Tang, Y. *J. Electroanal. Chem.* **1995**, 384, 105-113.
